# Supplementary material for: Psychometric Evaluation of the Women´s Knowledge of Obstetric Healthcare Rights and Perception of Resource Scarcity Tools
Source: Preprints.org preprint supplement (doi:10.20944/preprints202409.0183.v1), 2024-09-03
Supplement: Supplementary file 1 [file supplementary]

**Supplementary material**

**Table S1.** Expert´s scores, content validity index and Aiken’s V coefficient in each item and global for MatCODE and MatER questionaries. CVI-i: Content validity index item; SEM: standard error of mean. Aiken's V coefficient was calculated considering the language clarity, relevance, and coherence domains.

| **MatCODE** | **Expert 1** | **Expert 2** | **Expert 3** | **Expert 4** | **Expert 5** | **CVI-i** | **Aiken's V** |
| --- | --- | --- | --- | --- | --- | --- | --- |
| **Item 1** | 7 | 13 | 15 | 15 | 15 | 0.87 | 0.83 |
| **Item 2** | 11 | 14 | 11 | 13 | 14 | 0.84 | 0.80 |
| **Item 3** | 14 | 15 | 15 | 15 | 15 | 0.99 | 0.98 |
| **Item 4** | 15 | 15 | 15 | 15 | 15 | 1.00 | 1.00 |
| **Item 5** | 15 | 14 | 15 | 15 | 15 | 0.99 | 0.98 |
| **Item 6** | 9 | 15 | 15 | 15 | 14 | 0.91 | 0.88 |
| **Item 7** | 15 | 15 | 15 | 15 | 15 | 1.00 | 1.00 |
| **Item 8** | 15 | 15 | 15 | 15 | 14 | 0.99 | 0.98 |
| **Item 9** | 15 | 15 | 15 | 15 | 15 | 1.00 | 1.00 |
| **Item 10** | 15 | 15 | 7 | 15 | 14 | 0.88 | 1.00 |
| **Item 11** | 14 | 15 | 7 | 15 | 15 | 0.88 | 1.00 |
| **Mean±SEM** | 13.2±0.86 | 14.6±0.20 | 13.2±0.99 | 14.8±0.18 | 14.6±0.15 | 0.94±0.02 | 0.96±0.02 |
| **MatER** | **Expert 1** | **Expert 2** | **Expert 3** | **Expert 4** | **Expert 5** | **CVI-i** | **Aiken's V** |
| **Item 1** | 15 | 15 | 15 | 15 | 15 | 1.00 | 1.00 |
| **Item 2** | 14 | 15 | 15 | 15 | 15 | 0.99 | 0.98 |
| **Item 3** | 12 | 15 | 15 | 15 | 15 | 0.96 | 1.00 |
| **Item 4** | 14 | 15 | 15 | 15 | 15 | 0.99 | 0.98 |
| **Item 5** | 14 | 15 | 15 | 13 | 15 | 0.96 | 0.95 |
| **Item 6** | 15 | 15 | 15 | 15 | 15 | 1.00 | 1.00 |
| **Item 7** | 15 | 15 | 15 | 15 | 15 | 1.00 | 1.00 |
| **Item 8** | 15 | 15 | 15 | 15 | 15 | 1.00 | 1.00 |
| **Item 9** | 15 | 15 | 15 | 15 | 15 | 1.00 | 1.00 |
| **Mean±SEM** | 14.3±0.33 | 15.0±0.00 | 15.0±0.00 | 14.8±0.22 | 15.0±0.00 | 0.99±0.01 | 0.99±0.01 |

**
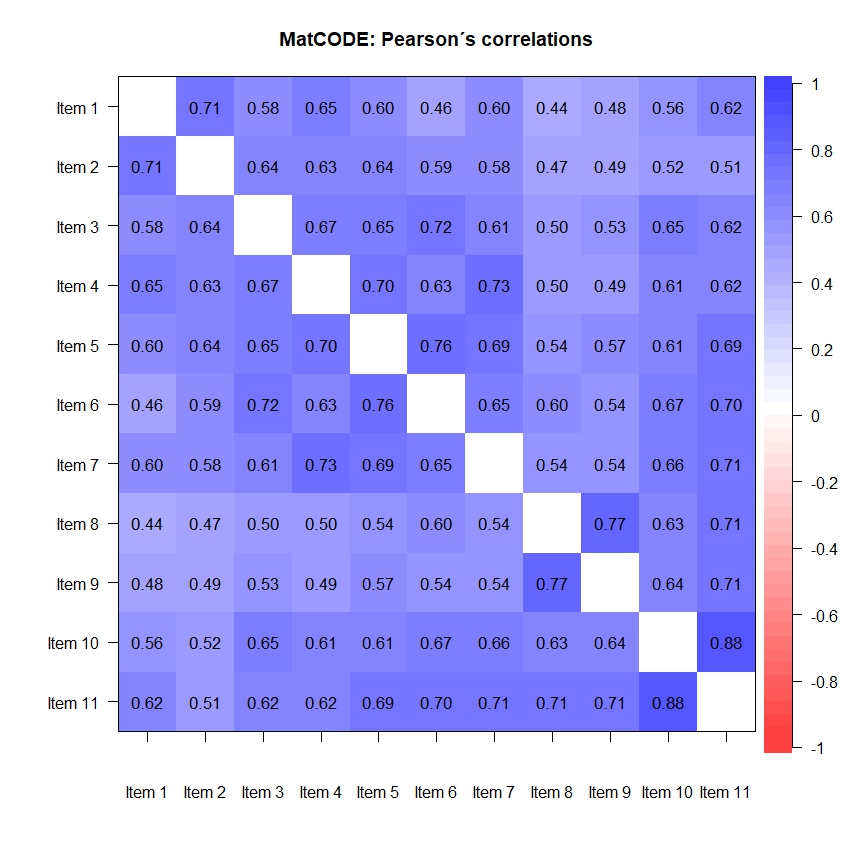
Figure S1.** Pearson´s correlation coefficients of the items from the questionnaires focus on women's knowledge of obstetric healthcare rights (MatCODE) and perception of resource scarcity (MatER) during pregnancy, labor and early postpartum.

**
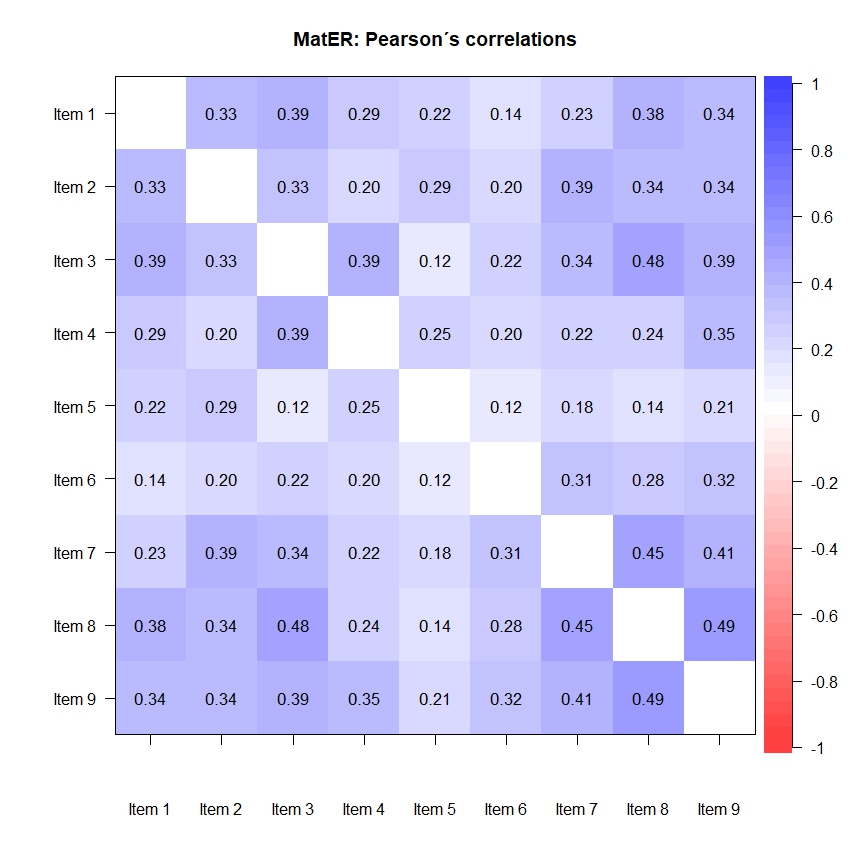
**

**Table S2**. The divergent analysis removing item 5 from MatER.Pearson´s correlation coefficient regarding to MatER scores with validated psychometric tests. RS-14: the Resilience scale; PANAS+: the Positive and Negative Affect Schedule positive score; PANAS-: the Positive and Negative Affect Schedule negative score; MBS-life: the Maternity Beliefs Scale maternity as a sense of life domain; MBS-social: the Maternity Beliefs Scale as a social duty domain. A p-Value (P)<0.05 was considered statistically significant.

|  | **MatER** |
| --- | --- |
| RS-14 | -0.34 [-0.48; -0.19]  P<0.001 |
| PANAS+ | -0.46 [-0.58; -0.31]  P<0.001 |
| PANAS- | 0.49 [0.36; 0.61]  P<0.001 |
| MBS-life | 0.01 [-0.16; 0.17]  P=0.940 |
| MBS-social | 0.03 [-0.13; 0.20]  P=0.685 |

**Table S3**. The known-groups validation removing item 5 from MatER. Data shown Mean±standard error of mean (SEM). Statistically significant was established as p-value (P)≤0.05 by Mann–Whitney U-test.

|  | | | **Mean±SEM** | **P** |  | | | **Mean±SEM** | | **P** | |
| --- | --- | --- | --- | --- | --- | --- | --- | --- | --- | --- | --- |
| Parity | Primiparous | 10.13±0.69 | | 0.322 | Last labor | C-section | 10.10±0.75 | | 0.372 | |
| Multiparous | 9.17±0.75 | | Vaginal | 9.38±0.69 | |
| Civil status | Single/unmarried | 11.12±1.61 | | 0.543 | Pregnancy complications | Yes | 10.93±0.96 | | 0.109 | |
| In relationship | 9.37±0.51 | | No | 9.11±0.96 | |
| Work situation | Unemployed | 10.52±0.80 | | 0.130 | Labor complications | Yes | 11.11±1.23 | | 0.123 | |
| Active working | 8.97±0.64 | | No | 9.35±0.56 | |
| Planned pregnancy | Yes | 8.41±0.61 | | 0.022 | Postpartum complications | Yes | 13.23±1.26 | | 0.003 | |
| No | 11.13±0.81 | | No | 9.04±0.54 | |
| Desired pregnancy | Yes | 9.06±0.51 | | 0.009 |  | | | | | | | |
| No | 13.79±1.69 | |
